# Supplementary figures and images for: MSI4/FVE is required for accumulation of 24‐nt siRNAs and DNA methylation at a subset of target regions of RNA‐directed DNA methylation
Source: PubMed Central journal article supplement — Plant J. 2021 Aug 21;108(2):347–57. doi: 10.1111/tpj.15441 (PMC9292519; doi:10.1111/tpj.15441), 2021-08-21

**a**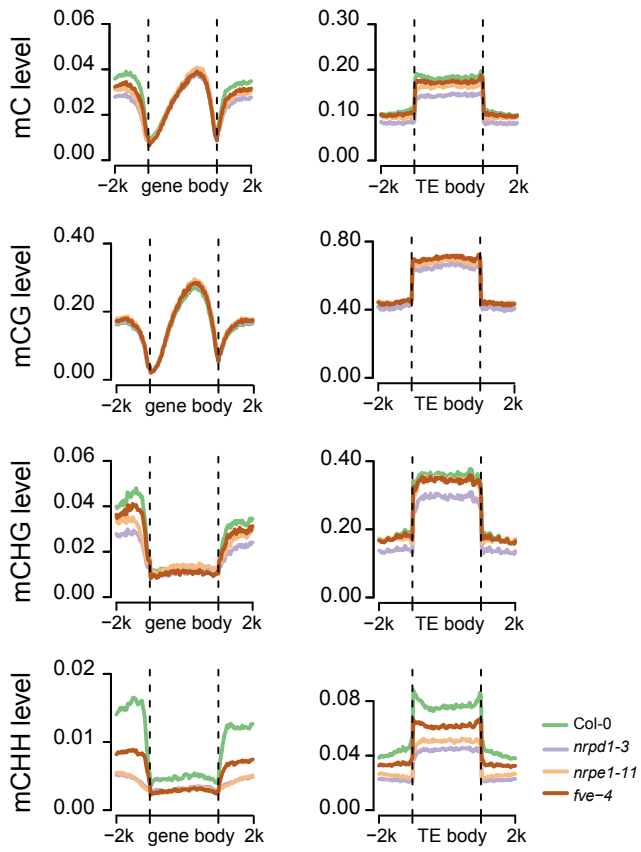**b**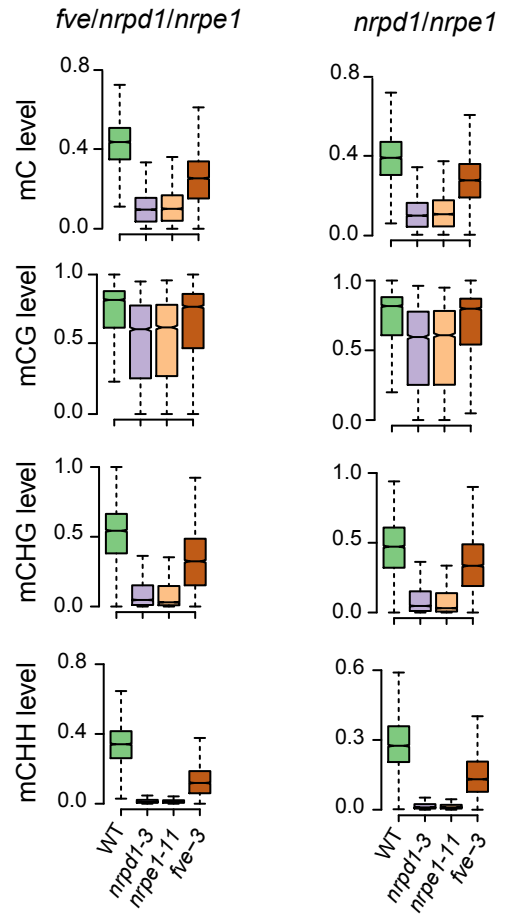

Supplement: TPJ-108-347-s001.pdf [file TPJ-108-347-s001.pdf]

**a**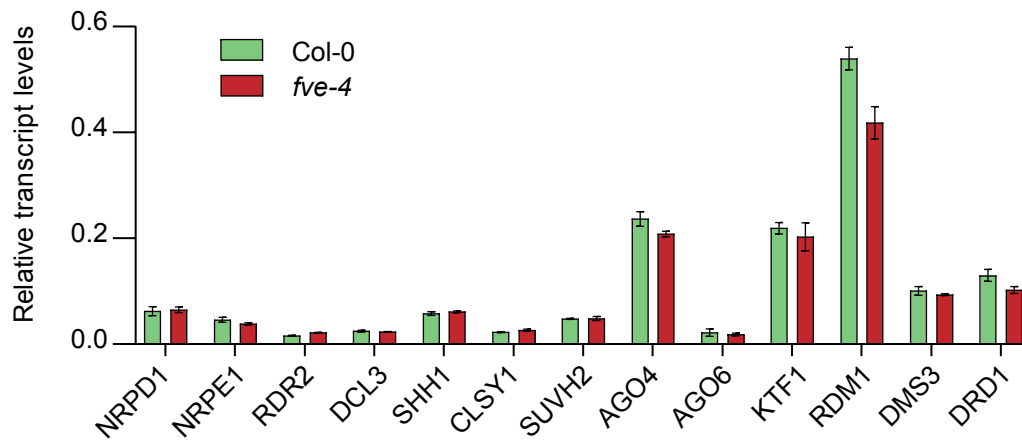**b**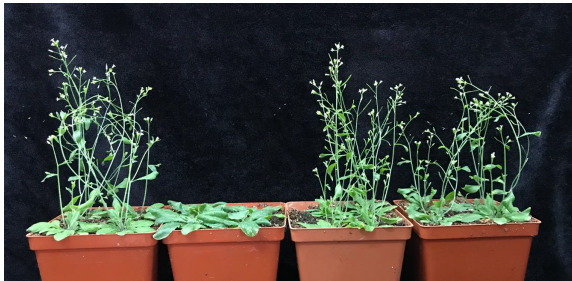

Col-0

*fve-4*FVE-3XFLAG  
*/fve-4*FVE-3XMYC  
*/fve-4***c**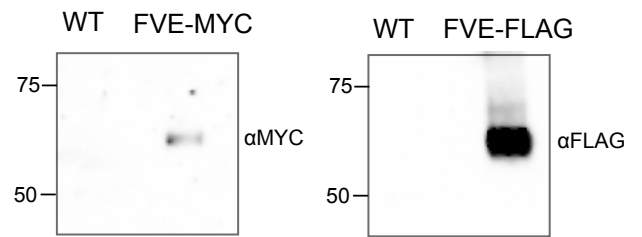

Supplement: TPJ-108-347-s004.pdf [file TPJ-108-347-s004.pdf]

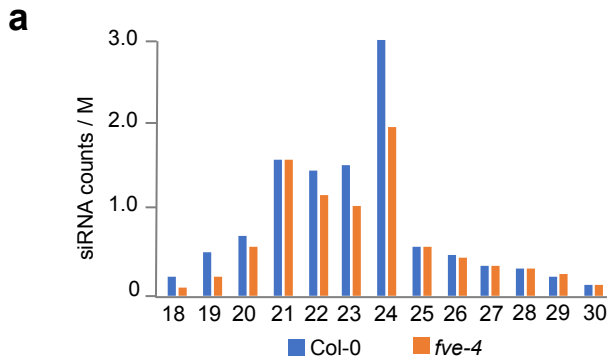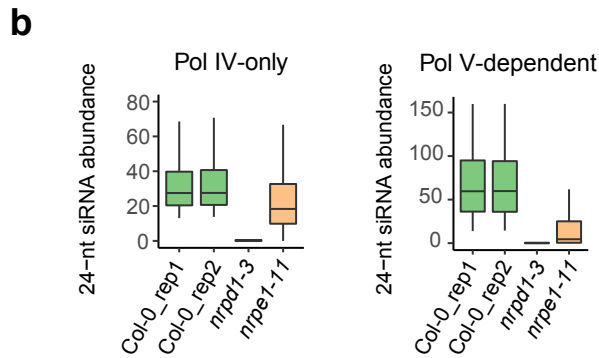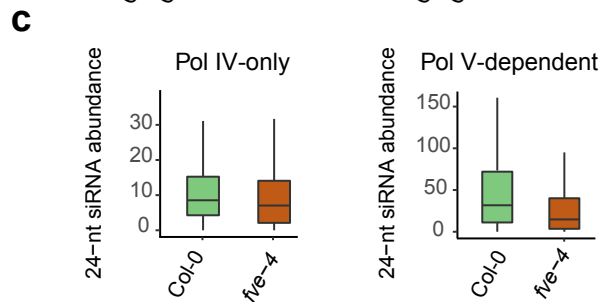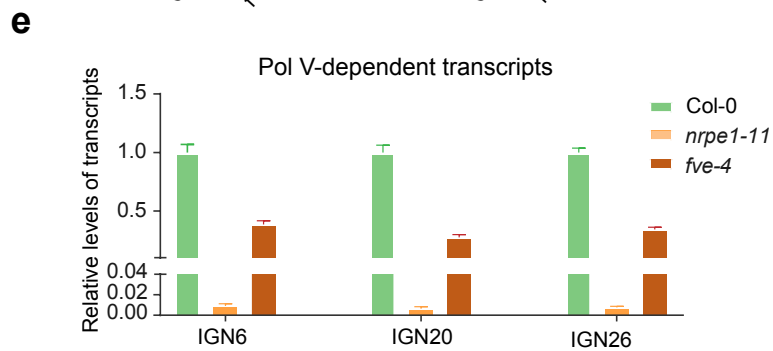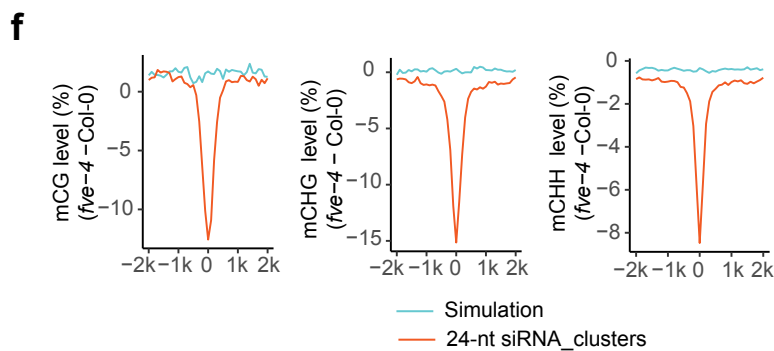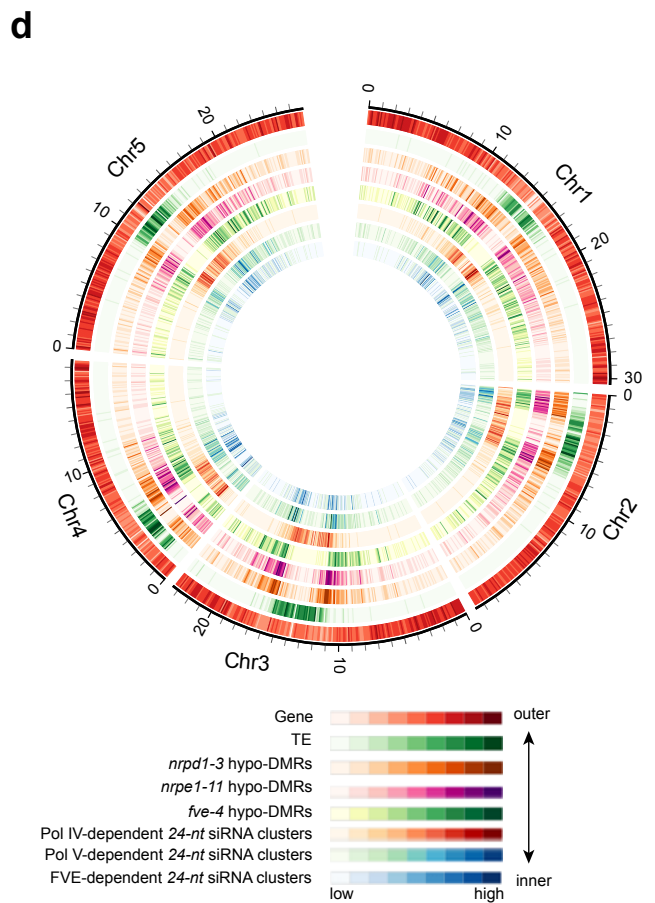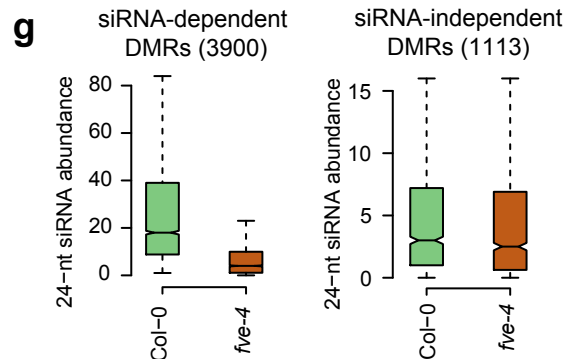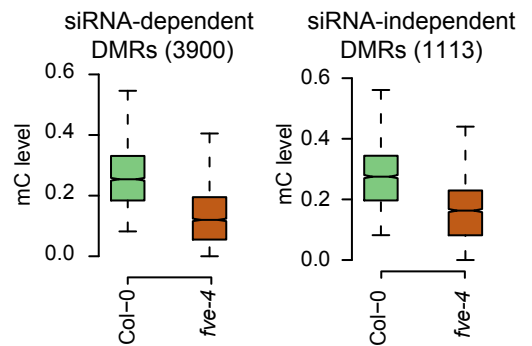

Supplement: TPJ-108-347-s005.pdf [file TPJ-108-347-s005.pdf]

**a**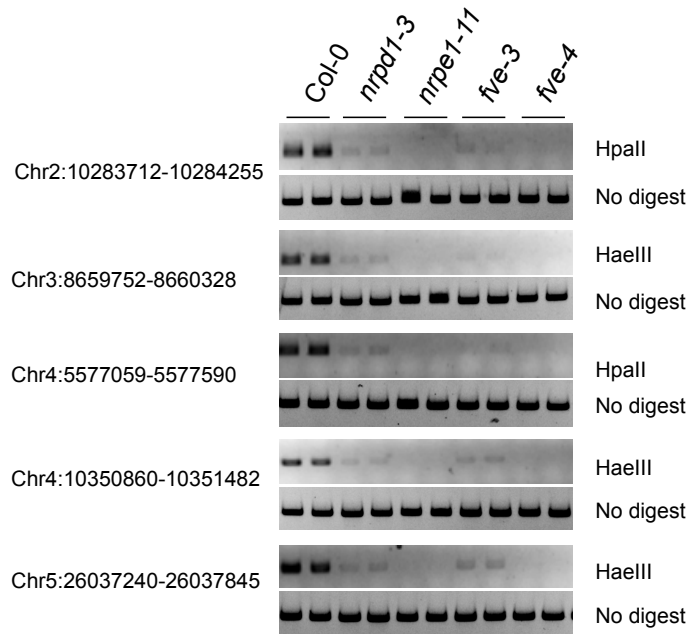**b**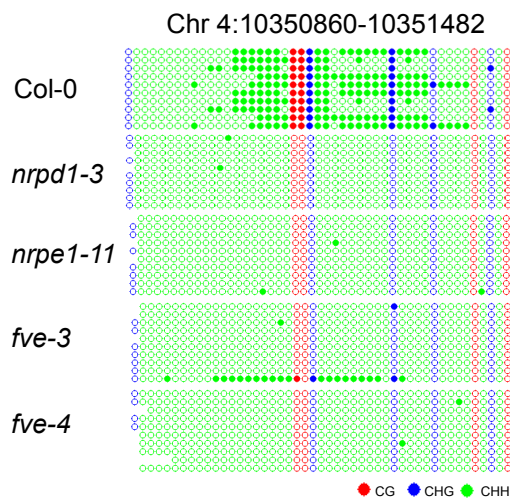**c**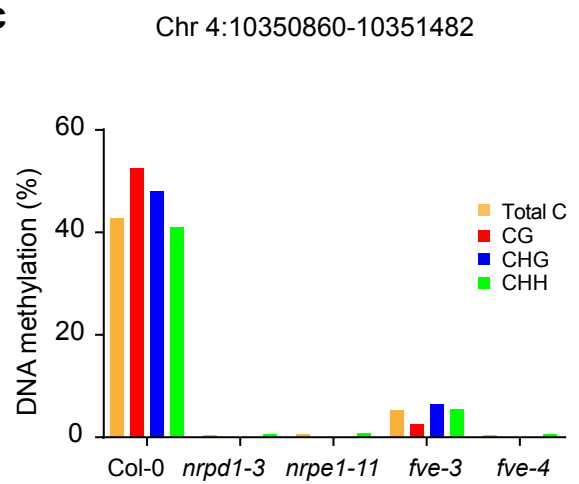

Supplement: TPJ-108-347-s006.pdf [file TPJ-108-347-s006.pdf]

**a**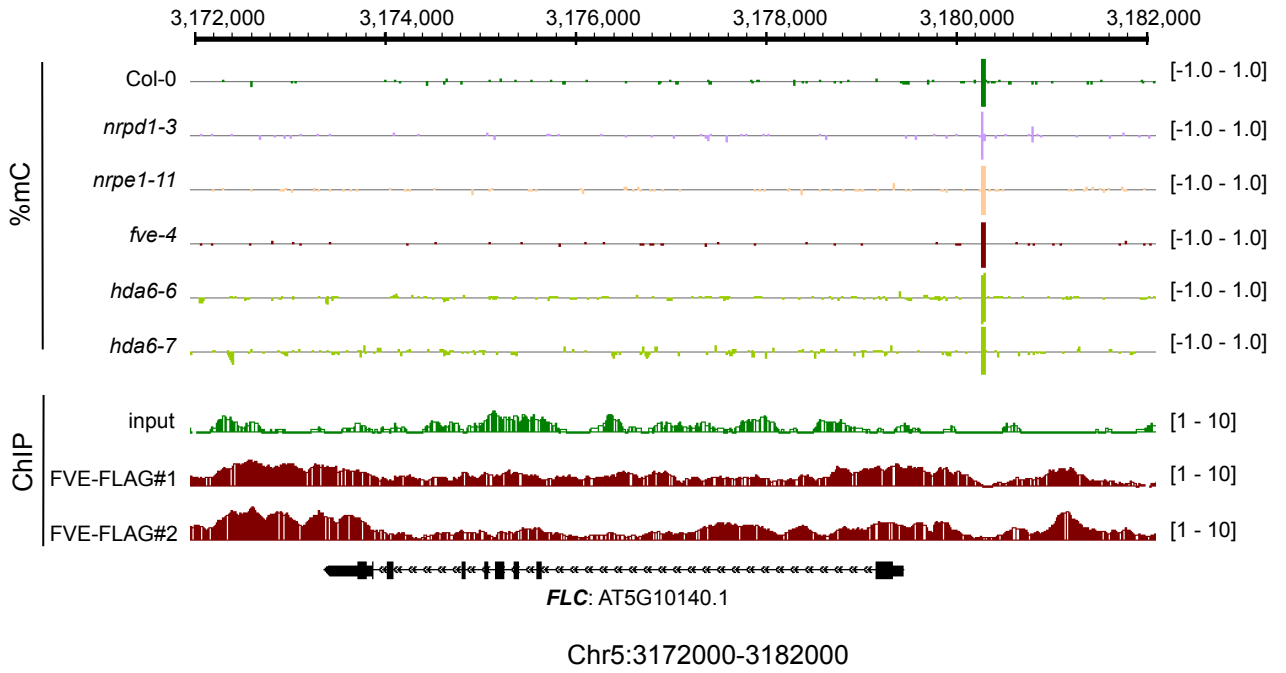**b**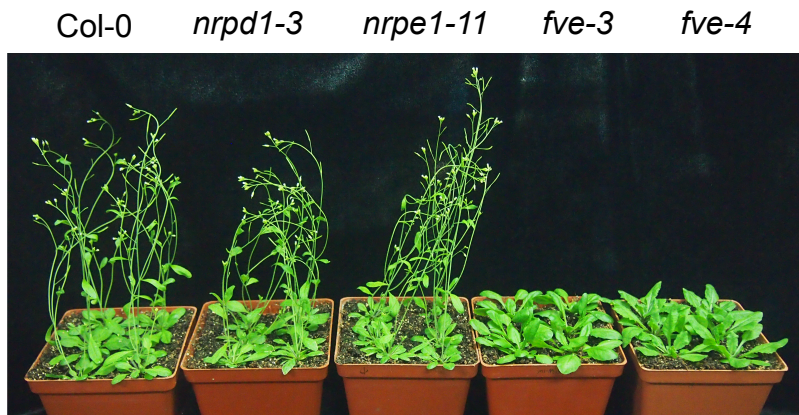

Supplement: TPJ-108-347-s008.pdf [file TPJ-108-347-s008.pdf]
